# Supplementary material
Source: PubMed Central journal article supplement (PMC3243935)
Supplement: supp_kwr213_kwr213_Web_Table_1.pdf [file supp_kwr213_kwr213_Web_Table_1.pdf]

**Web Table 1** All patient- and facility-level covariates

| Covariate                                       | Data Source              |     |       |
|-------------------------------------------------|--------------------------|-----|-------|
|                                                 | Medicare/Medicaid Claims | MDS | OSCAR |
| <b>PATIENT-LEVEL</b>                            |                          |     |       |
| Calendar year                                   | X                        |     |       |
| Gender                                          | X                        |     |       |
| Age                                             | X                        |     |       |
| Education                                       |                          | X   |       |
| BMI                                             |                          | X   |       |
| Race                                            |                          | X   |       |
| State                                           | X                        |     | X     |
| Time from nursing home admission to index date  | X                        |     |       |
| <b>Cardiovascular morbidity</b>                 |                          |     |       |
| Myocardial infarction                           | X                        |     |       |
| Cardiac arrhythmia                              | X                        |     |       |
| Other cardiac dysrhythmias                      | X                        |     |       |
| Other cardiac conduction disturbances           | X                        |     |       |
| Ischemic heart disease                          | X                        |     |       |
| Hypertension                                    | X                        |     |       |
| Congestive heart failure                        | X                        |     |       |
| Other cardiovascular disease                    | X                        |     |       |
| Hospitalization for circulatory system disorder | X                        |     |       |
| Coronary artery disease                         | X                        |     |       |
| <b>Cerebrovascular disease</b>                  |                          |     |       |
|                                                 | X                        |     |       |
| <b>Psychiatric morbidity</b>                    |                          |     |       |
| Dementia                                        | X                        | X   |       |
| Alzheimer's disease                             |                          | X   |       |
| Psychotic disorder                              | X                        |     |       |
| Depressive disorder                             | X                        | X   |       |
| Anxiety disorder                                | X                        | X   |       |
| Alcohol abuse or dependence                     | X                        |     |       |
| Drug abuse or dependence                        | X                        |     |       |
| Delirium                                        | X                        | X   |       |
| Delusions                                       |                          | X   |       |
| Mental retardation                              | X                        |     |       |
| Sleep disorder                                  | X                        |     |       |
| Personality disorder                            | X                        |     |       |
| Other mental disorder                           | X                        |     |       |
| Cognitive function                              |                          | X   |       |
| Verbally/physically abusive behavior            |                          | X   |       |
| Non-aggressive behavioral problems              |                          | X   |       |
| <b>Other conditions</b>                         |                          |     |       |
| Obesity                                         | X                        |     |       |
| Diabetes                                        | X                        |     |       |
| Seizures/epilepsy                               | X                        |     |       |
| Parkinson's disease                             | X                        |     |       |
| Multiple sclerosis                              | X                        |     |       |
| Electrolyte abnormalities                       | X                        |     |       |
| Electroconvulsive therapy procedure codes       | X                        |     |       |
| Organ transplant                                | X                        |     |       |
| Home oxygen use                                 | X                        |     |       |
| Hospice care                                    | X                        |     |       |

| Covariate                                                                                                                                                   | Data Source              |     |       |
|-------------------------------------------------------------------------------------------------------------------------------------------------------------|--------------------------|-----|-------|
|                                                                                                                                                             | Medicare/Medicaid Claims | MDS | OSCAR |
| Functional impairment                                                                                                                                       |                          | X   |       |
| <b>General indicators of comorbidity</b>                                                                                                                    |                          |     |       |
| Charlson Comorbidity Index                                                                                                                                  | X                        |     |       |
| Number of different drugs (generic entities) received                                                                                                       | X                        |     |       |
| Number of outpatient medical services                                                                                                                       | X                        |     |       |
| Number of days hospitalized for any condition                                                                                                               | X                        |     |       |
| Number of days in nursing home                                                                                                                              | X                        |     |       |
| <b>Other health conditions, treatments and services</b>                                                                                                     |                          |     |       |
| Admitted from psychiatric hospital                                                                                                                          |                          | X   |       |
| Bedfast                                                                                                                                                     |                          | X   |       |
| Sleeps all/most of the day                                                                                                                                  |                          | X   |       |
| Unclear or no speech                                                                                                                                        |                          | X   |       |
| Alzheimer/dementia unit                                                                                                                                     |                          | X   |       |
| Psychological therapy                                                                                                                                       |                          | X   |       |
| Mood/behavioral intervention                                                                                                                                |                          | X   |       |
| <b>Medication history</b>                                                                                                                                   |                          |     |       |
| Antidepressants                                                                                                                                             | X                        |     |       |
| Hypnotic agents                                                                                                                                             | X                        |     |       |
| Other psychoactive medication (i.e., barbiturate, non-benzodiazepine anxiolytic, stimulant/ADHD medication, lithium, valproate, carbamazepine, lamotrigine) | X                        |     |       |
| Dementia treatment                                                                                                                                          | X                        |     |       |
| Anti-arrhythmia medication                                                                                                                                  | X                        |     |       |
| <b>FACILITY-LEVEL</b>                                                                                                                                       |                          |     |       |
| Number of beds in facility                                                                                                                                  |                          |     | X     |
| Hospital based                                                                                                                                              |                          |     | X     |
| Part of multi-facility ownership structure (chain)                                                                                                          |                          |     | X     |
| For profit                                                                                                                                                  |                          |     | X     |
| Government ownership                                                                                                                                        |                          |     | X     |
| Nonprofit ownership                                                                                                                                         |                          |     | X     |
| Religious based nonprofit                                                                                                                                   |                          |     | X     |
| Occupancy rate                                                                                                                                              |                          |     | X     |
| Proportion of residents on Medicaid                                                                                                                         |                          |     | X     |
| Proportion of residents on Medicare                                                                                                                         |                          |     | X     |
| Proportion private pay/private insurance residents                                                                                                          |                          |     | X     |
| Alzheimer's special care unit                                                                                                                               |                          |     | X     |
| Any non-Alzheimer's special care unit                                                                                                                       |                          |     | X     |
| Organized group of family members                                                                                                                           |                          |     | X     |
| <b>Quality Indicators</b>                                                                                                                                   |                          |     |       |
| Proportion residents bedfast                                                                                                                                |                          |     | X     |
| Proportion residents chair fast                                                                                                                             |                          |     | X     |
| Proportion with facility acquired bedsores                                                                                                                  |                          |     | X     |
| Proportion with restraints                                                                                                                                  |                          |     | X     |
| Proportion on psychoactive medicines                                                                                                                        |                          |     | X     |
| Proportion with symptoms in behavior program                                                                                                                |                          |     | X     |
| Proportion with catheter                                                                                                                                    |                          |     | X     |
| Proportion with contractures                                                                                                                                |                          |     | X     |
| Total number of deficits                                                                                                                                    |                          |     | X     |
| <b>Staffing</b>                                                                                                                                             |                          |     |       |

| Covariate                                    | Data Source                              |     |       |
|----------------------------------------------|------------------------------------------|-----|-------|
|                                              | Medicare/Medicaid Claims                 | MDS | OSCAR |
| Team-based physician care                    |                                          |     | x     |
| No physicians available <sup>(1)</sup>       |                                          |     | x     |
| Mental health staffing                       |                                          |     | x     |
| <b>Residents</b>                             |                                          |     |       |
| Proportion with dementia                     |                                          |     | x     |
| Proportion with psychiatric diagnosis        |                                          |     | x     |
| Proportion with signs/symptoms of depression |                                          |     | x     |
| Urban vs. rural setting                      | Source: Rural-Urban Commuting Areas file |     |       |

<sup>(1)</sup> No physician on staff who supervises the care of residents when the attending physician is unavailable.
